# Supplementary material for: Metabolomics with Nuclear Magnetic Resonance Spectroscopy in a Drosophila melanogaster Model of Surviving Sepsis
Source: MDPI journal article supplement (doi:10.3390/metabo6040047), 2016-12-21
Supplement: s1 [file s1]

# Supplementary Materials: Metabolomics with Nuclear Magnetic Resonance Spectroscopy in a *Drosophila melanogaster* Model of Surviving Sepsis

Veli Bakalov, Roland Amathieu, Mohamed N. Triba, Marie-Jeanne Clément, Laura Reyes Uribe, Laurence Le Moyec and Ata Murat Kaynar

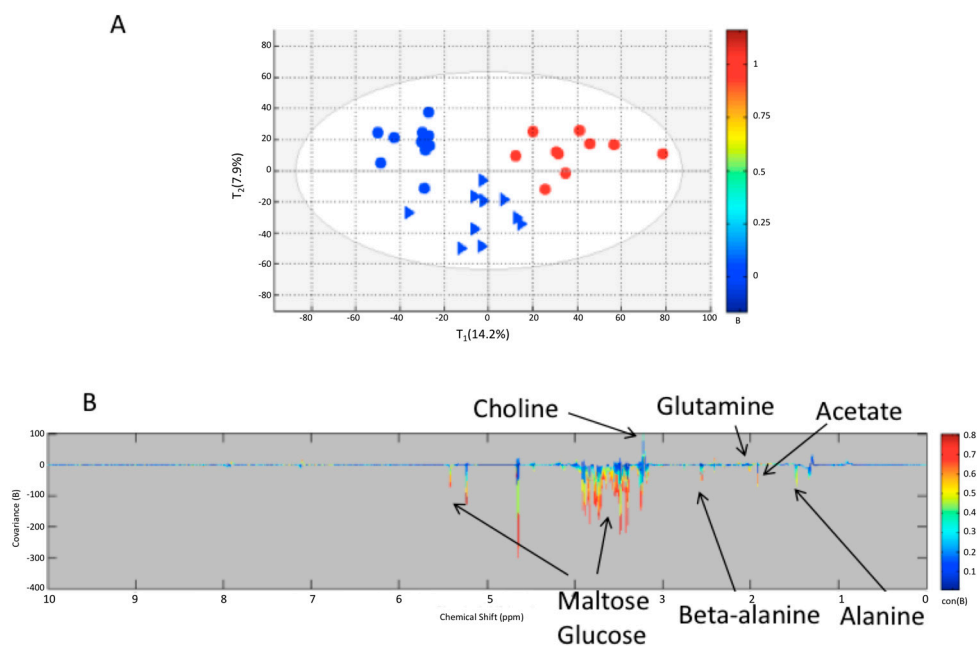

**Figure S1.** PLS model computed with the three groups of *Drosophila melanogaster*. The score plot (A) shows the variability of each sample according to their groups; The loading plot (B) shows the covariance of the spectral bins colored according to the  $R$  values between the model and the group belonging. Blue dots: unmanipulated; blue triangles: sham; Red dots: sepsis survivors.

-  Irreversible reaction
-  Reversible reaction
-  Metabolites in:
-  Default

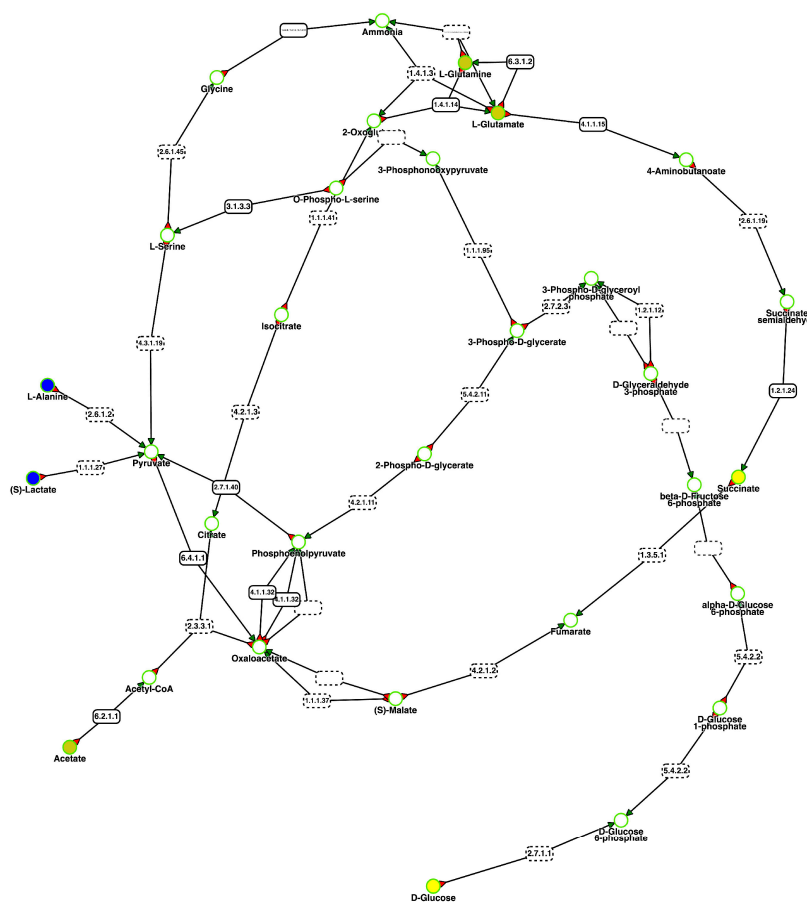

**Figure S2.** MetExplore extracted sub-pathways relating the highest number of metabolites from the Table 1. The metabolites, in OPLS model comparing sham to sepsis survivors, down-regulated are colored in yellow and those detected not modulated colored in blue.
